# Supplementary material for: Metal organic frameworks-derived Co3O4 hollow dodecahedrons with controllable interiors as outstanding anodes for Li storage
Source: Royal Society of Chemistry journal article supplement (doi:10.1039/c4ta01966k), 2014-01-01
Supplement: c4ta01966k1.pdf [file c4ta01966k1.pdf]

Electronic Supplementary Information for  
Metal organic frameworks-derived  $\text{Co}_3\text{O}_4$  hollow dodecahedrons with controllable  
interiors as outstanding anodes for Li storage

Jie Shao,<sup>‡ a,c</sup> Zhongming Wan,<sup>‡ a</sup> Hongmei Liu,<sup>a</sup> Huiyuan Zheng,<sup>a</sup> Tian Gao,<sup>a</sup> Ming Shen,<sup>b</sup>

Qunting Qu,<sup>\* a</sup> and Honghe Zheng<sup>\* a</sup>

<sup>a</sup> School of Energy & Collaborative Innovation Center of Suzhou Nano Science and Technology, Soochow University, Suzhou Jiangsu 215006, China. E-mail: qtqu@suda.edu.cn; hhzheng@suda.edu.cn

<sup>b</sup> Huasheng Chemical Corporation, Zhangjiagang, Jiangsu 215635, China

<sup>c</sup> College of Chemistry, Chemical Engineering and Material Science, Soochow University, Suzhou Jiangsu 215006, China

**Supplementary figures**

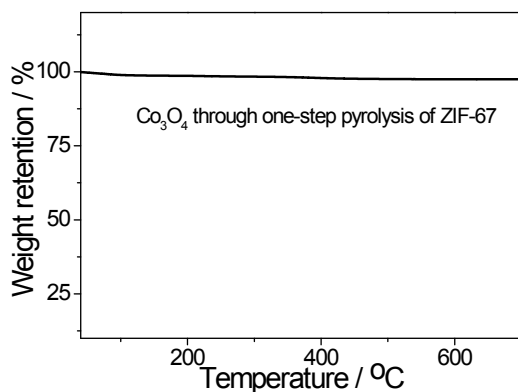

Fig. S1 TG curve of  $\text{Co}_3\text{O}_4$  obtained through one-step calcination of ZIF-67.

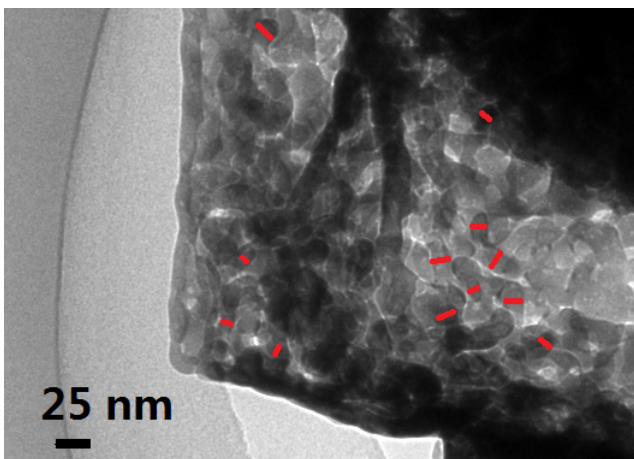

Fig. S2 TEM image of ball-in-dodecahedron  $\text{Co}_3\text{O}_4$  taken at the edge of one typical dodecahedron. The average size of nanoparticles as marked with red lines was estimated to be about 18 nm.

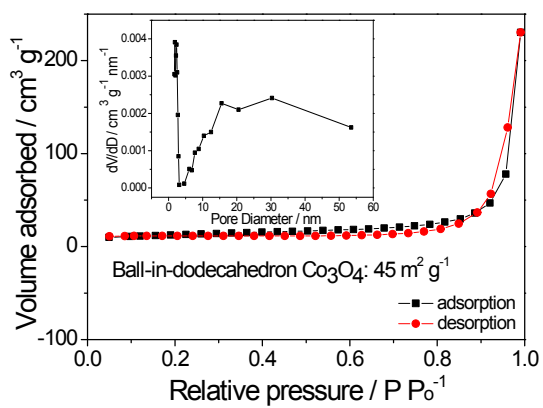

Fig. S3  $\text{N}_2$  adsorption/desorption isotherms of ball-in-dodecahedron  $\text{Co}_3\text{O}_4$  and the corresponding pore-size distribution curve.

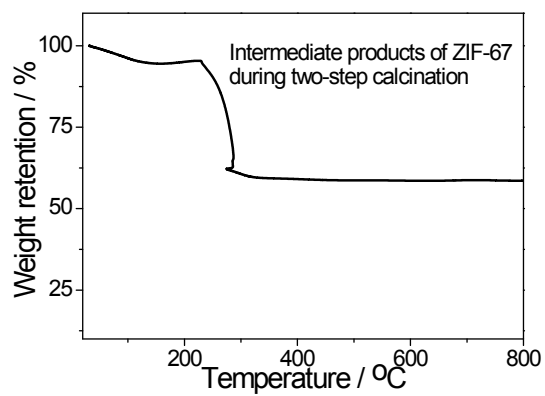

Fig. S4 TG curve of the intermediate products after the first-step calcination of ZIF-67 under  $N_2$  atmosphere.

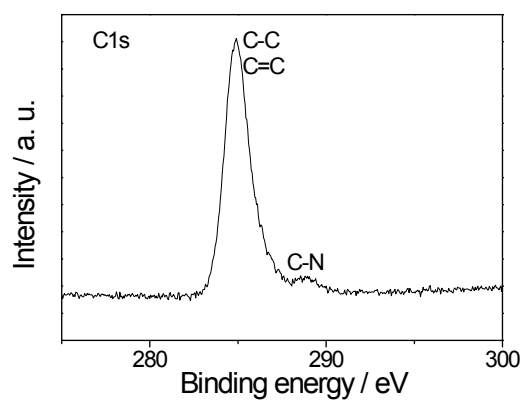

Fig. S5 C1s XPS spectrum of the intermediate products after the first-step calcination of ZIF-67 under  $N_2$  atmosphere.

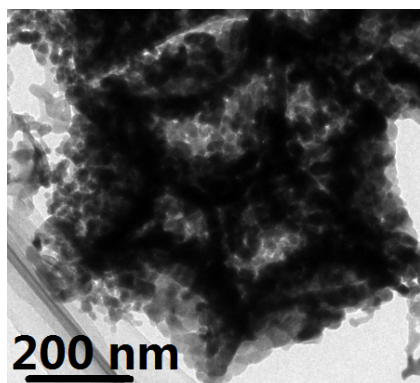

Fig. S6 The typical TEM image of  $\text{Co}_3\text{O}_4$  obtained through two-step calcination of ZIF-67.

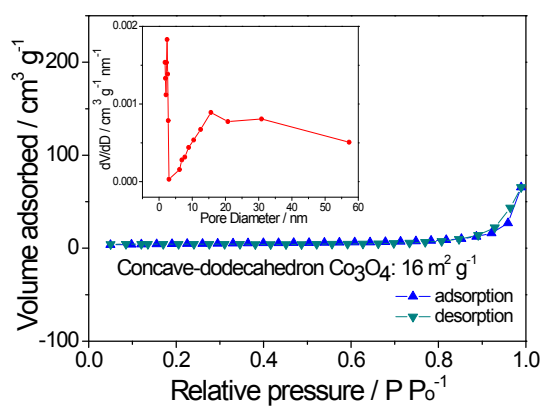

Fig. S7  $\text{N}_2$  adsorption/desorption isotherms of concave-dodecahedron  $\text{Co}_3\text{O}_4$  and the corresponding pore-size distribution curve.

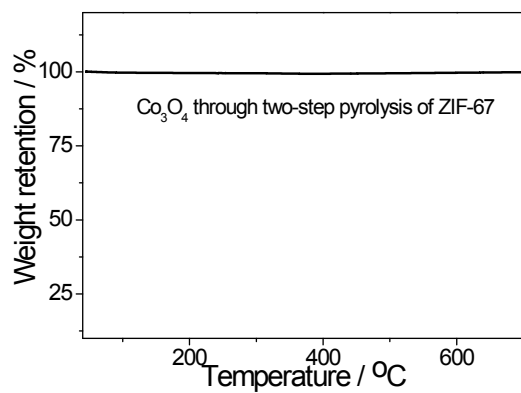

Fig. S8 TG curve of  $\text{Co}_3\text{O}_4$  obtained through two-step calcination of ZIF-67.

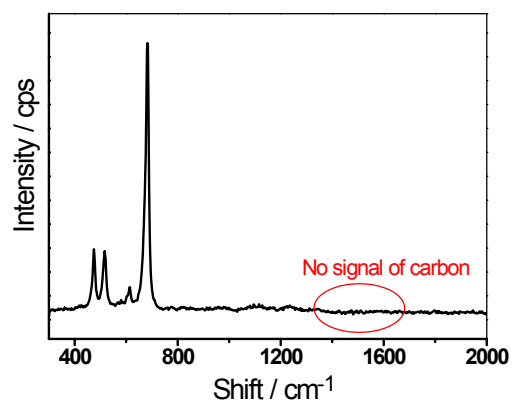

Fig. S9 Raman spectrum of  $\text{Co}_3\text{O}_4$  obtained through two-step calcination of ZIF-67.

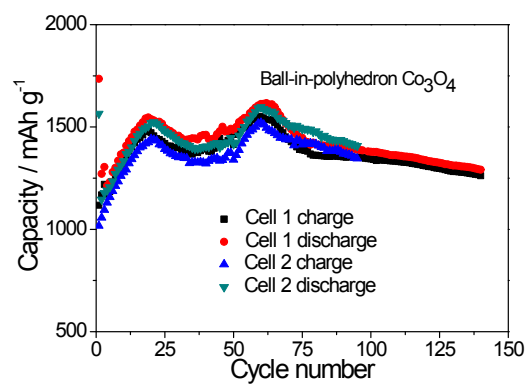

Fig. S10 Cycling behaviors of ball-in-dodecahedron Co<sub>3</sub>O<sub>4</sub> tested in two coin-cells.
